# Supplementary material for: Prognostic and Predictive Values of the Immunoscore in Patients with Rectal Cancer
Source: Oxford University Press journal article supplement (doi:10.1158/1078-0432.ccr-13-2830), 2014-03-31
Supplement: 10780432ccr132830-sup-120831_1_supp_2275178_my2m3b.doc [file 10780432ccr132830-sup-120831_1_supp_2275178_my2m3b.doc]

**Table 1 sup:** characteristics of the HEGP cohort of rectal cancer patients

**Table 2 sup:** Characteristics of the St Spiridon Hospital cohort of patients

**Characteristic**

**no. of pts. (%)**

Median age (range)

62.

7 (42.0

-

81.1)

Sex

men

38 (69)

women

17 (31)

Tumor location

low rectum

5 (9)

middle rectum

50 (91)

Pathological T stage

yp T 0

4 (7)

yp T 1

1 ( 2)

yp T2

19 (35)

yp T3

27 (49)

yp T4

4 (7)

Pathological N s

tage

yp N0

34 (62)

yp N1

-

N2

21 (38)

Pathological M stage

yp M0

53 (96)

yp M1

2 (4)

pUICC

-

TNM stage

P Complete Response

4 (7)

I

13 (23)

II

16 (30)

III

20 (36)

IV

2 (4)

Histologic grade

no tumor

4 (7)

well

8 (15)

mo

derately differentiated

35 (63)

poorly differentiated

2 (4)

unknown

6 (11)

Surgical resection

R0

55 (100)

R1

0

Clinical UICC

-

TNM stage

II

18 (33

)

III

37 (67)

Clinical T category

cT2

2 (4)

cT3

47 (85)

cT4

6 (11)

Clinical N category

cN0

18 (33)

cN1

-

N2

37 (67)

Time between RXT and surgery

> 6 weeks

46 (84)

< 6 weeks

9 (16)

Median radiotherapy dose (range),

Gy

48.2 (39

-

56)

Neoadjuvant treatment

rxt

13 (24)

rct

42 (76)

Concurrent chem

otherapy

capecitabin p.o.

36 (90)

other

4 (10)

**Table 3 sup:** Immune infiltration of CD3+ and CD8+ cells in tumor regions and clinical outcome. Cohort of 111 patients eligible to primary surgery.

**Table 4 sup:** Patients at risk at each interval in the Kaplan Meier survival curves for the duration of DFS and OS according to the Immunoscore (CD3-CD8).

**Table 5 sup:** Repartition of the “surgery cohort” patient’s according to Stage and Immunoscore
